# Supplementary material for: Controlled formation of large-area single-crystalline TIPS-pentacene arrays through superhydrophobic micropillar flow-coating
Source: Royal Society of Chemistry journal article supplement (doi:10.1039/c6tc04704a), 2017-01-01
Supplement: c6tc04704a1.pdf [file c6tc04704a1.pdf]

## Supplementary Information for

# Controlled Formation of Large-Area Single-Crystalline TIPS- Pentacene Arrays through Superhydrophobic Micropillar Flow- Coating

Chengyi Xiao,<sup>a</sup> Xiaonan Kan,<sup>b</sup> Chunming Liu,<sup>b</sup> Wei Jiang,<sup>b</sup> Guangyao Zhao,<sup>b</sup> Qiang Zhao,<sup>b</sup> Lei Zhang,<sup>a\*</sup> Wenping Hu,<sup>b</sup> Zhaohui Wang,<sup>b</sup> and Lei Jiang<sup>c</sup>

<sup>a</sup>College of Energy, Beijing University of Chemical Technology, Beijing, 100029, P. R. China. E-mail: zhl@mail.buct.edu.cn

<sup>b</sup>Beijing National Laboratory for Molecular Sciences, Key Laboratory of Organic Solids and Laboratory of New Materials, Institute of Chemistry, Chinese Academy of Sciences (ICCAS), Beijing, 100190, P. R. China

<sup>c</sup>Laboratory of Bio-inspired Smart Interface Science, Technical Institute of Physics and Chemistry, Chinese Academy of Sciences, Beijing, 100190, P. R. China

\*Corresponding author: Lei Zhang, E-mail: zhl@mail.buct.edu.cn

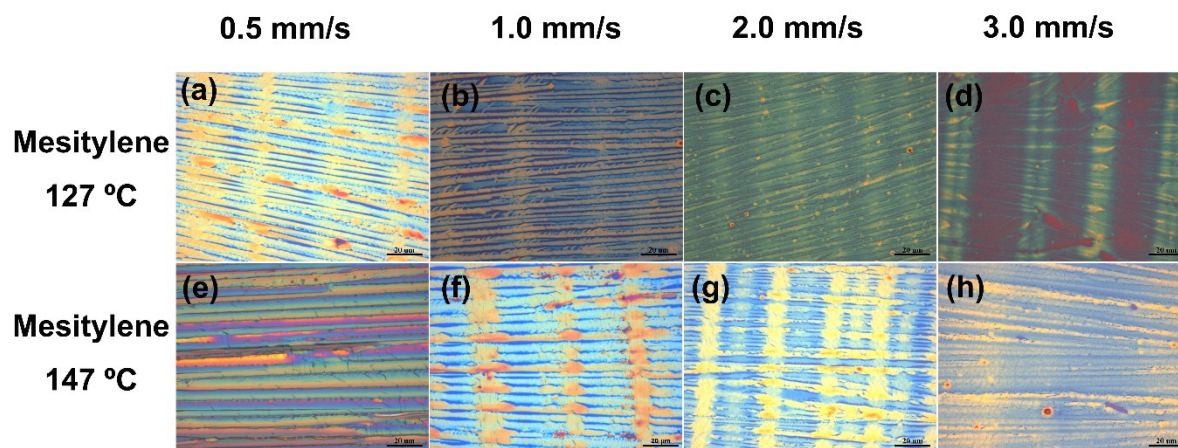

**Figure S1.** Optical microscopy images of superhydrophobic micropillar flow-coating (SMFC) single-crystalline arrays/thin films at different coating speeds and coating temperatures.

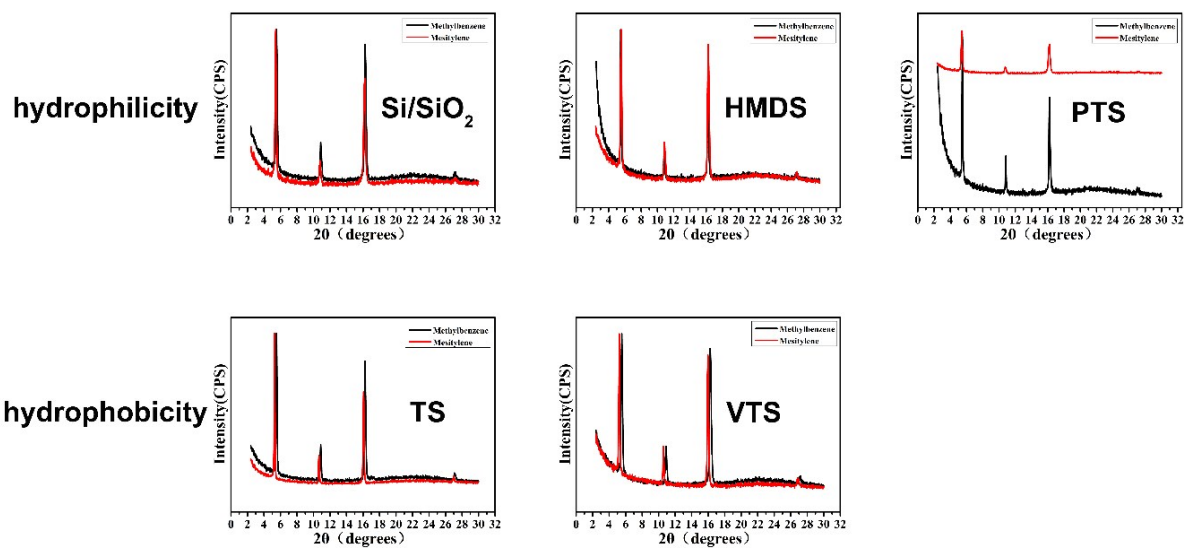

**Figure S2.** Out-of-plane X-ray diffraction (XRD) pattern for the coated TIPS-pentacene single-crystalline arrays/thin films at different substrates and solvents.

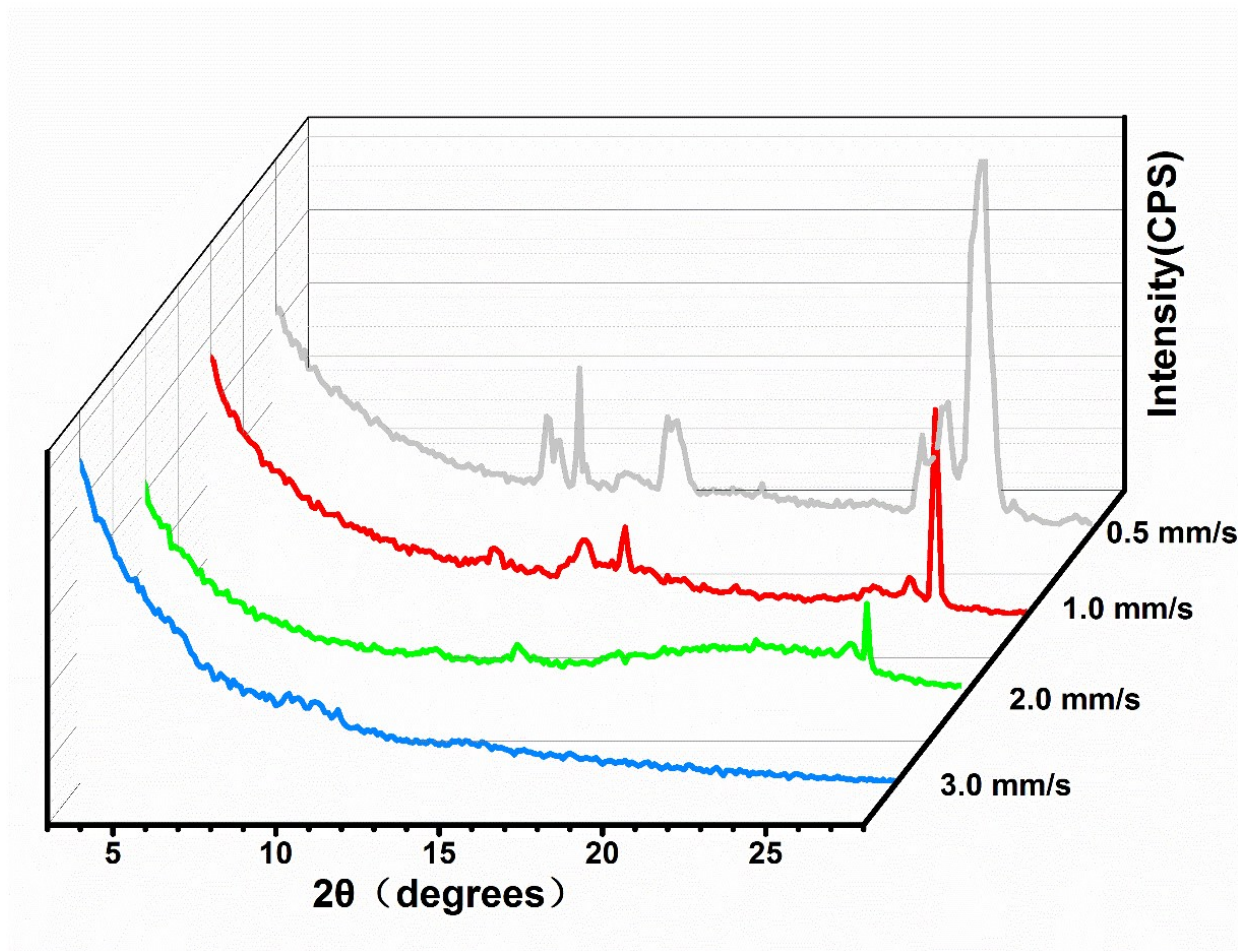

**Figure S3.** In-plane GIXRD patterns with near grazing angle of the incidence beam direction parallel to the array.

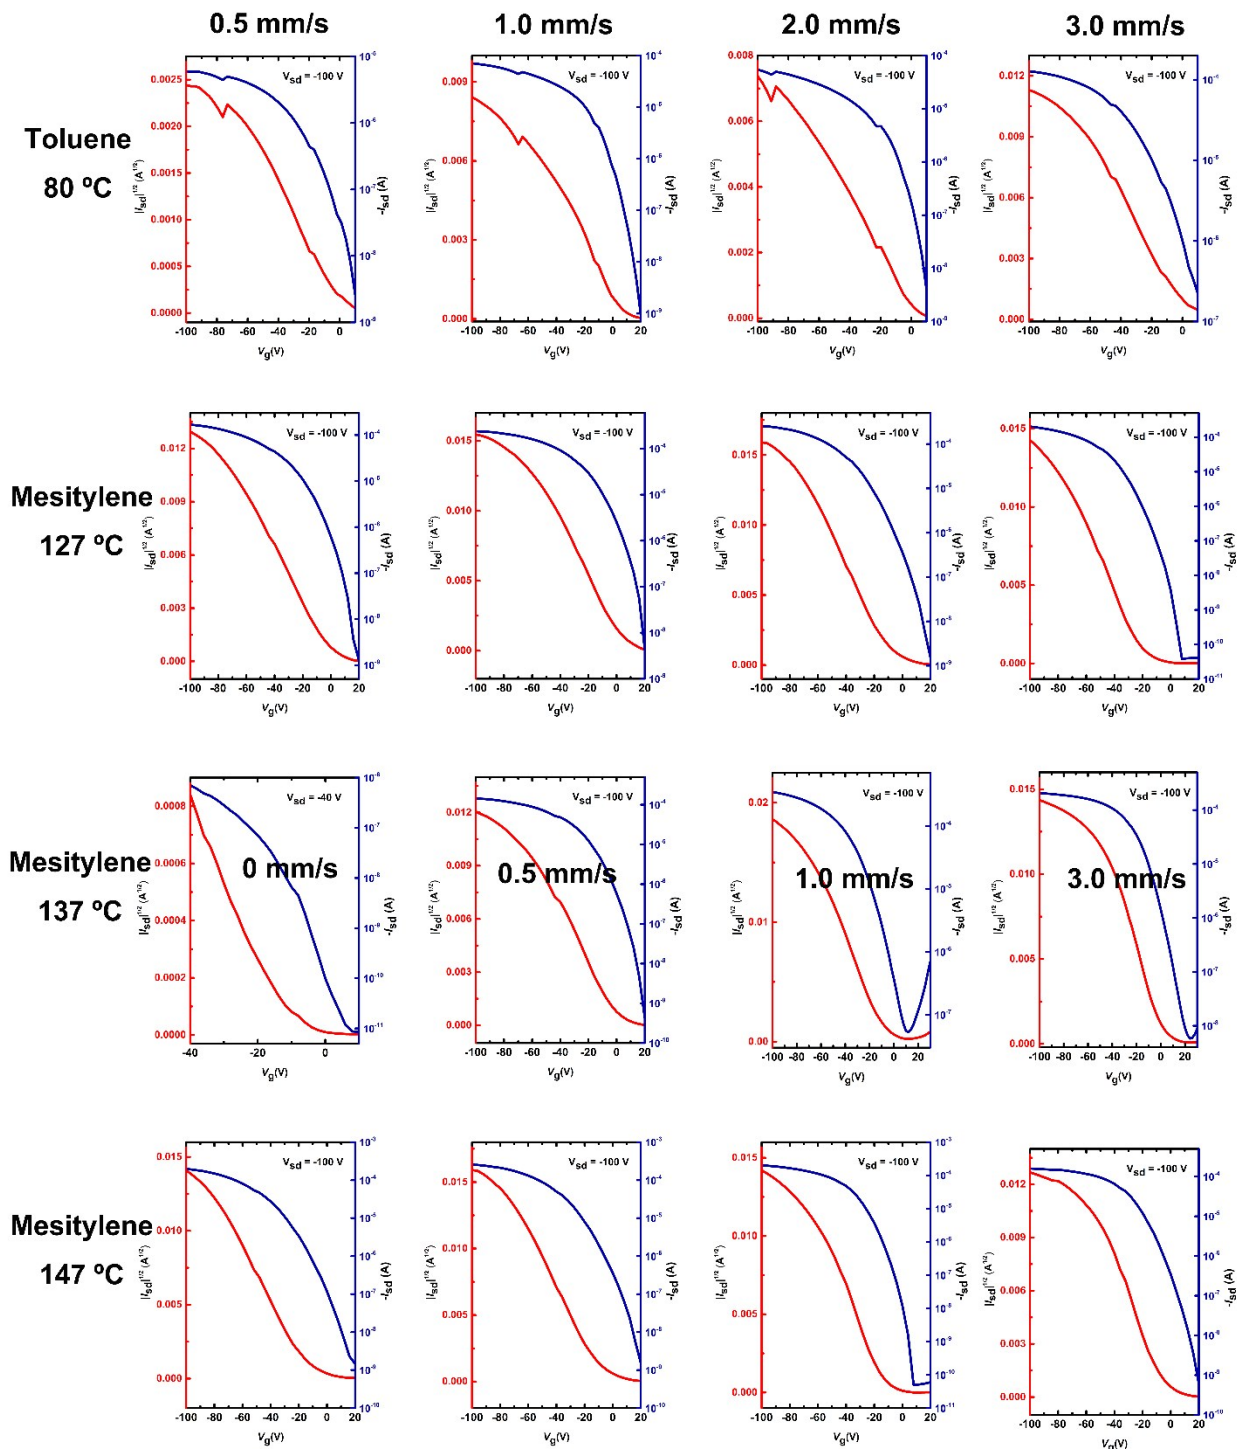

**Figure S4.** The transfer characteristics of the TIPS-pentacene single-crystalline arrays at different temperatures, different solvents, and different coating speeds on the PTS substrates. TIPS pentacene OFET(137 °C and 0 mm/s<sup>-1</sup>, mesitylene solution) was fabricated according to the literature.<sup>S1</sup>

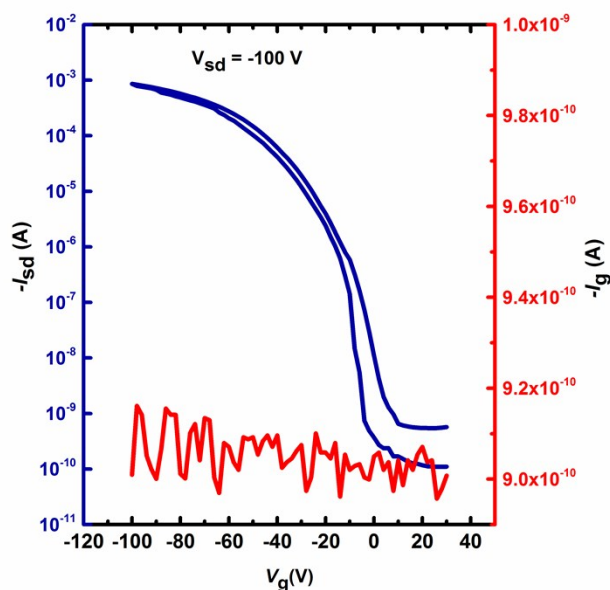

**Figure S5.** Gate leakage and hysteresis in the transfer curve of the TIPS-pentacene single-crystalline array at the optimized conditions on the PTS-modified substrates.

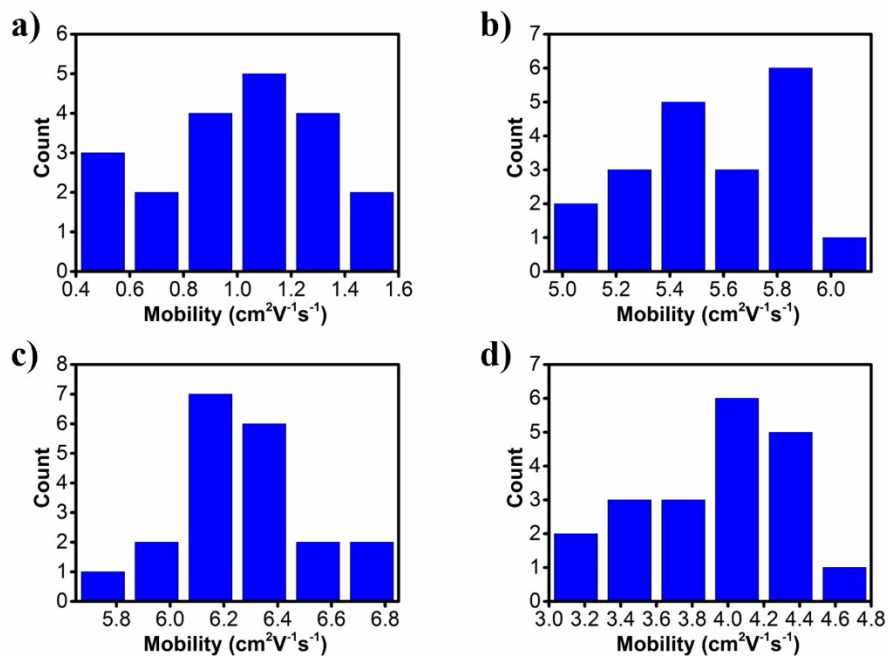

**Figure S6.** Statistics of the electrical characteristics of SMFC single-crystalline arrays/thin films (Coating conditions: mesitylene, 137 °C). Coating speed: a) 0.5 mm/s; b) 1.0 mm/s; c) 2.0 mm/s; d) 3.0 mm/s.

## References

S1 X. Kan, C. Xiao, X. Li, B. Su, Y. Wu, W. Jiang, Z. Wang, L. Jiang, *ACS Appl. Mater. Interfaces*, **2016**, 8, 18978-18984.
